# Supplementary material for: Acute and chronic effects of roxarsone on biological nitrogen and phosphorus removal and its mechanism
Source: Royal Society of Chemistry journal article supplement (doi:10.1039/c7ra02561k), 2017-01-01
Supplement: c7ra02561k1.pdf [file c7ra02561k1.pdf]

**Supporting Information**

**Acute and Chronic Effects of Roxarsone on Biological Nitrogen and Phosphorus**

**Removal and Its Mechanism**

Weijiang Huang, Shengjin Sun, Zhao Gao, Chen Yu, Lin Wu\*

School of Tropical and Laboratory Medicine, Hainan Medical University, Haikou, 571101,

P.R. China

Corresponding Author: Lin Wu

E-mail: yfdong112@126.com

Table S1 Statistical analysis results of PHA synthesis under the influence of different concentrations of pollutants

| Roxarsone (mg/L) | F <sub>observed</sub> | F <sub>significant</sub> | P (0.05)              |
|------------------|-----------------------|--------------------------|-----------------------|
| 0                | 3.05                  | 4.07                     | 3.21                  |
| 30               | 2.98                  | 4.07                     | 0.89                  |
| 60               | 1.64                  | 4.07                     | $1.26 \times 10^{-2}$ |
| 90               | 1.25                  | 4.07                     | $9.12 \times 10^{-2}$ |
| 120              | 0.56                  | 4.07                     | $7.06 \times 10^{-3}$ |

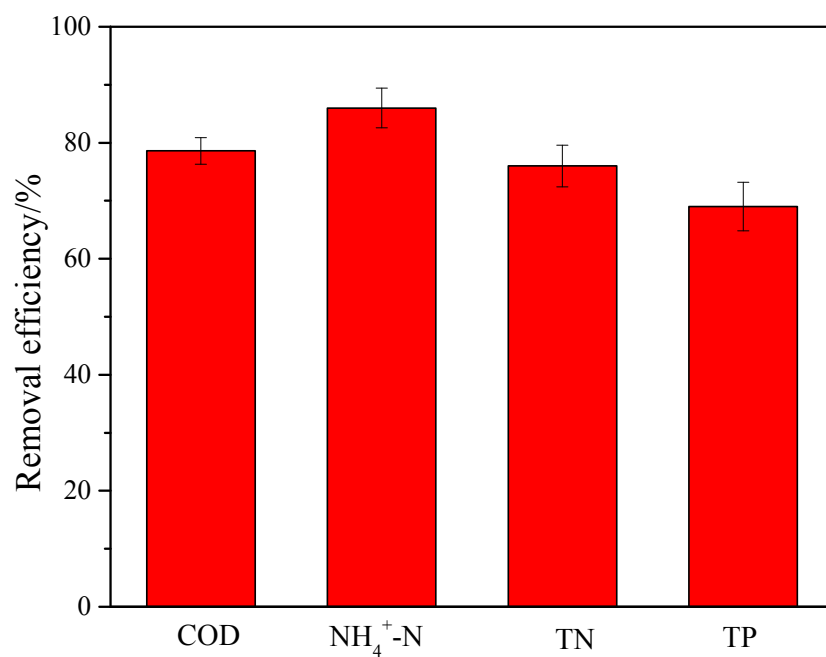

Figure S1 Effect of roxarsone on BNR performance in a livestock and poultry breeding wastewater treatment station during stable operation period.
